# Supplementary material for: Characterization and Release Mechanisms of Aerogel-Encapsulated Biocide Crystals for Low-Loading and High-Utilization Antifouling Coatings
Source: PubMed Central journal article supplement — ACS Omega. 2022 Sep 22;7(39):34824–38. doi: 10.1021/acsomega.2c03133 (PMC9535643; doi:10.1021/acsomega.2c03133), 2022-09-22
Supplement: ao2c03133_si_001.pdf [file ao2c03133_si_001.pdf]

**Supporting Information for**

**Characterization and Release Mechanisms of Aerogel-  
encapsulated Biocide Crystals for Low-loading and High-  
utilization Antifouling Coatings**

Tenna Frydenberg<sup>a,b</sup>, Claus E. Weinell<sup>a</sup>, Kim Dam-Johansen<sup>a</sup>, Eva Wallström<sup>\*b</sup>, Søren Kiil<sup>a</sup>

<sup>\*</sup>Corresponding author, email address: [ewa@encoat.dk](mailto:ewa@encoat.dk)

<sup>a</sup>The Hempel Foundation Coatings Science and Technology Centre (CoaST), Department of Chemical and Biochemical Engineering, Technical University of Denmark (DTU), 2800 Kgs. Lyngby, Denmark

<sup>b</sup>EnCoat ApS, Lersø Park allé 38, 2100 København Ø, Denmark

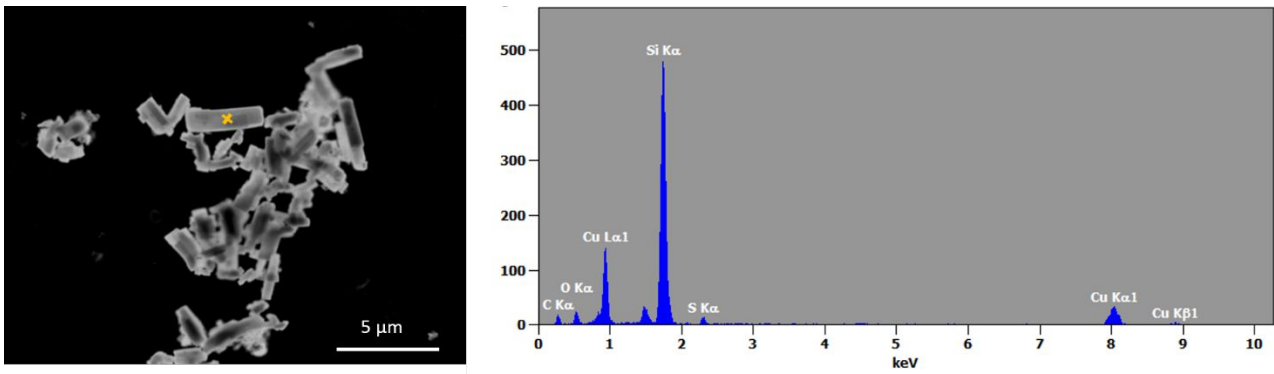

Figure S1. EDS point analysis of elongated particles in sample C75SA. Spectrum extracted from the orange cross in the STEM image.

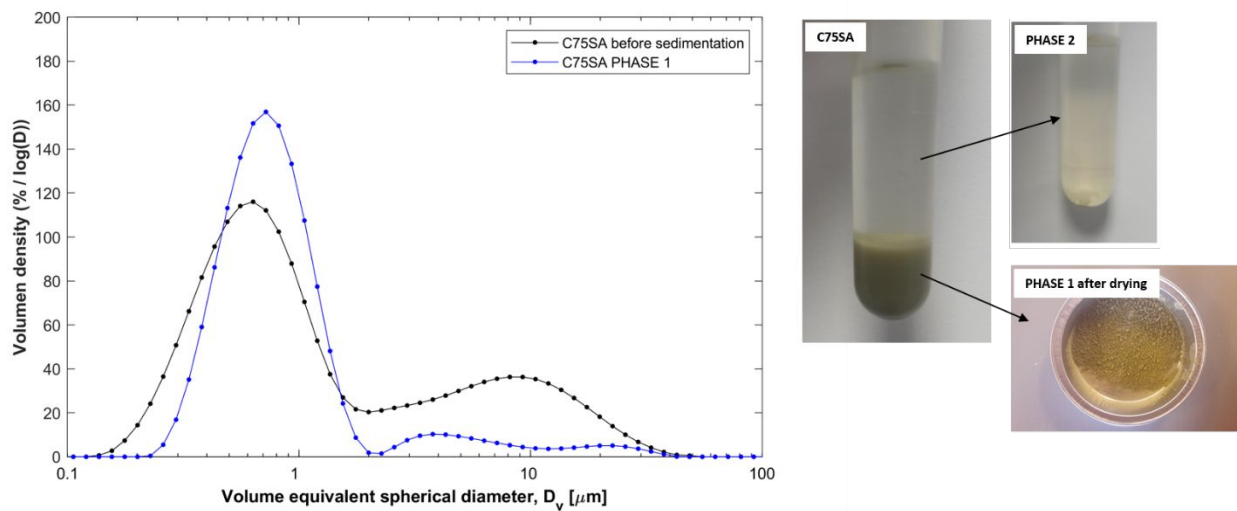

Figure S2. a) Sample C75SA after separation in a centrifuge. The upper supernatant phase (2) consisted of silica aerogels without CuPT, while the lower phase (1) was sedimentation of CuPT-loaded silica aerogels. Phase 2 was removed using a pipette and phase 1 was dried for further analysis. b) PSD of sample C75SA before and after sedimentation test. The second peak was reduced after sedimentation due to the removal of empty silica residues.

$$\text{Silica layer thickness} = \frac{D_{\text{aerogel}} - D_{\text{CuPT}}}{2}$$

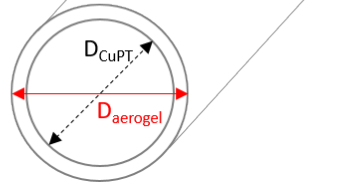

Figure S3. Definition of rod diameters  $D_{\text{CuPT}}$  and  $D_{\text{aerogel}}$  observed in PSDs. Assuming an idealized rod shape of the elongated aerogel particles, the silica layer thickness can be estimated by the given formula.
